# Supplementary material
Source: PubMed Central journal article supplement (PMC3220736)
Supplement: NIHMS311177-supplement-Supp_Table_S1.pdf [file NIHMS311177-supplement-Supp_Table_S1.pdf]

**Table S2.** Estimates of the effect of cerebellar volumetric reductions on total and regional cerebral volume

| <b>Regional cerebral volumes (cc)</b> | <b>Estimate of effect<sup>+</sup></b> | <b>95% Confidence interval</b> | <b>p-value</b> |
|---------------------------------------|---------------------------------------|--------------------------------|----------------|
| Total cerebral                        | 1.28                                  | 0.18, 2.38                     | 0.02           |
| Total cerebral white matter           | 0.42                                  | -0.09, 0.93                    | 0.11           |
| Total cerebral grey matter            | 0.82                                  | 0.19, 1.45                     | 0.01           |
| Deep grey matter nuclei               | 0.04                                  | 0.01, 0.07                     | 0.02           |
| Dorsolateral prefrontal white matter  | 0.06                                  | -0.02, 0.13                    | 0.13           |
| Dorsolateral prefrontal grey matter   | 0.10                                  | 0.00, 0.21                     | 0.06           |
| Orbitofrontal white matter            | -0.01                                 | -0.04, 0.03                    | 0.70           |
| Orbitofrontal grey matter             | 0.01                                  | -0.05, 0.07                    | 0.79           |
| Premotor white matter                 | 0.06                                  | -0.03, 0.14                    | 0.21           |
| Premotor grey matter                  | 0.09                                  | -0.01, 0.19                    | 0.07           |
| Subgenual white matter                | 0.06                                  | 0.03, 0.10                     | 0.001          |
| Subgenual grey matter                 | 0.07                                  | 0.03, 0.11                     | 0.001          |
| Sensorimotor white matter             | 0.08                                  | -0.02, 0.17                    | 0.13           |
| Sensorimotor grey matter              | 0.08                                  | -0.02, 0.17                    | 0.11           |
| Midtemporal white matter              | 0.02                                  | 0.00, 0.04                     | 0.02           |
| Midtemporal grey matter               | 0.08                                  | 0.02, 0.14                     | 0.01           |
| Parieto-occipital white matter        | 0.17                                  | -0.01, 0.35                    | 0.06           |
| Parieto-occipital grey matter         | 0.34                                  | 0.11, 0.56                     | 0.004          |
| Inferior occipital white matter       | -0.01                                 | -0.09, 0.07                    | 0.82           |
| Inferior occipital grey matter        | 0.06                                  | -0.10, 0.22                    | 0.44           |

+ Estimate of effect: Relationship between cerebellar volume reduction (difference between cases and controls) and total and regional cerebral volumes in children with cerebellar malformations
